# Supplementary material for: One-pot synthesis of g-C3N4-doped amine-rich porous organic polymer for chlorophenol removal
Source: Royal Society of Chemistry journal article supplement (doi:10.1039/c7en00787f), 2017-11-24
Supplement: c7en00787f1.pdf [file c7en00787f1.pdf]

## Supplementary Information

### One-pot synthesis of g-C<sub>3</sub>N<sub>4</sub>-doped rich-amine porous organic polymer for chlorophenol removal

Haijian Ou,<sup>‡a</sup> Weijun Zhang,<sup>‡b</sup> Xiaofang Yang,<sup>c</sup> Qingrong Cheng,<sup>d</sup> Guiying Liao,<sup>a</sup>  
Hua Xia<sup>a</sup> and Dongsheng Wang<sup>ac</sup>

*<sup>a</sup>Department of Chemistry, Faculty of Material Science and Chemistry, China  
University of Geosciences, Wuhan, 430074, Hubei, China*

*<sup>b</sup>School of Environmental Studies, China University of Geosciences, Wuhan 430074,  
Hubei, China*

*<sup>c</sup>State Key Laboratory of Environmental Aquatic Chemistry, Research Center for co-  
Environmental Sciences, Chinese Academy of Sciences, Beijing 100085, China*

*<sup>d</sup>Wuhan Institute of Technology, Wuhan 430074, China*

<sup>‡</sup> Authors Haijian Ou and Weijun Zhang contributed equally to this work.

\* **Corresponding Author 1:** Name: Guiying Liao, E-mail: [liaogy@cug.edu.cn](mailto:liaogy@cug.edu.cn)

\*\* **Corresponding Author 2:** Name: Dongsheng Wang, Email: [wgds@rcees.ac.cn](mailto:wgds@rcees.ac.cn)

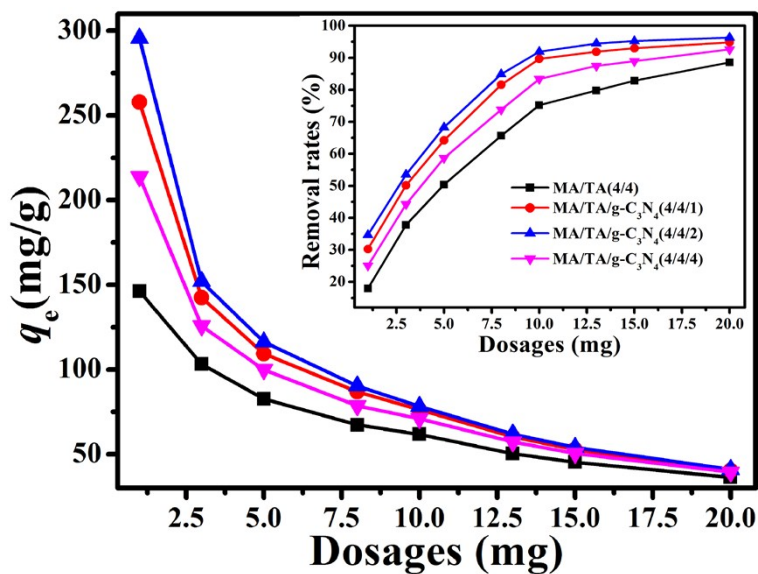

**Fig. S1** Effect of adsorbent dosage on equilibrium adsorption amount  $q_e$  and removal rate (inset) (solutions:  $20 \text{ mg} \cdot \text{L}^{-1}$  40 mL, pH=7, time: 2 minutes, temperature: 298 K).

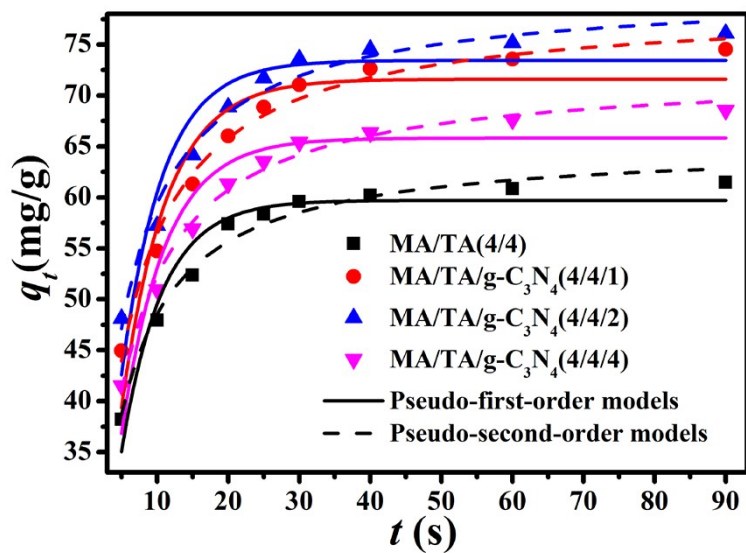

**Fig. S2** Nonlinear fittings of pseudo-first-order and pseudo-second-order models on the adsorption of 2,4-DCP by RAPOP and g-C<sub>3</sub>N<sub>4</sub>/RAPOP.

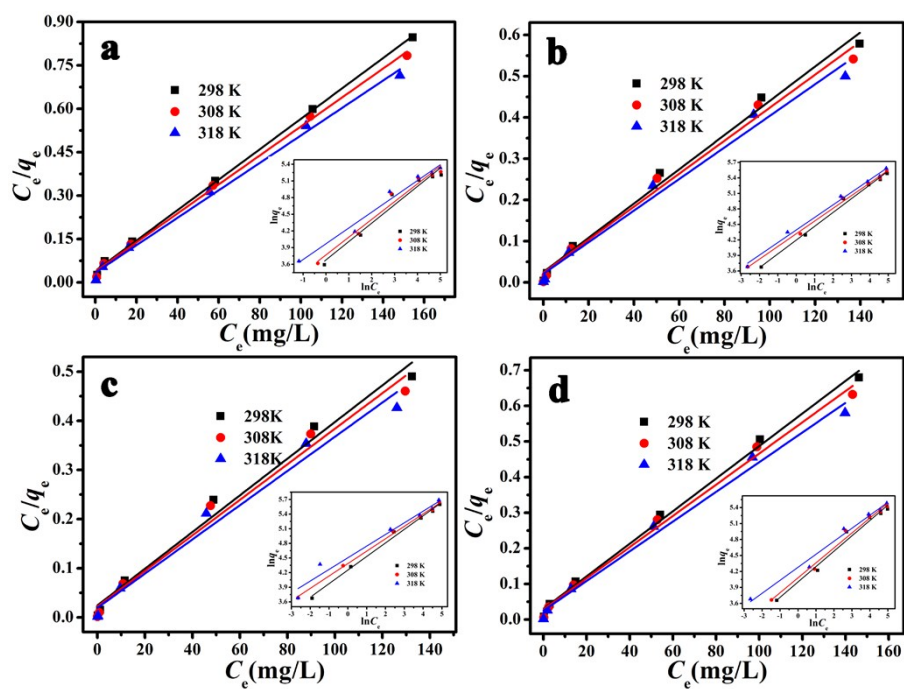

**Fig. S3** Linear fittings of Langmuir and Freundlich (inset) models on the adsorption of 2,4-DCP by RAPOP and g-C<sub>3</sub>N<sub>4</sub>/RAPOP with MA/TA (4/4) (a), MA/TA/g-C<sub>3</sub>N<sub>4</sub> (4/4/1) (b), MA/TA/g-C<sub>3</sub>N<sub>4</sub> (4/4/2) (c) and MA/TA/g-C<sub>3</sub>N<sub>4</sub> (4/4/4) (d).

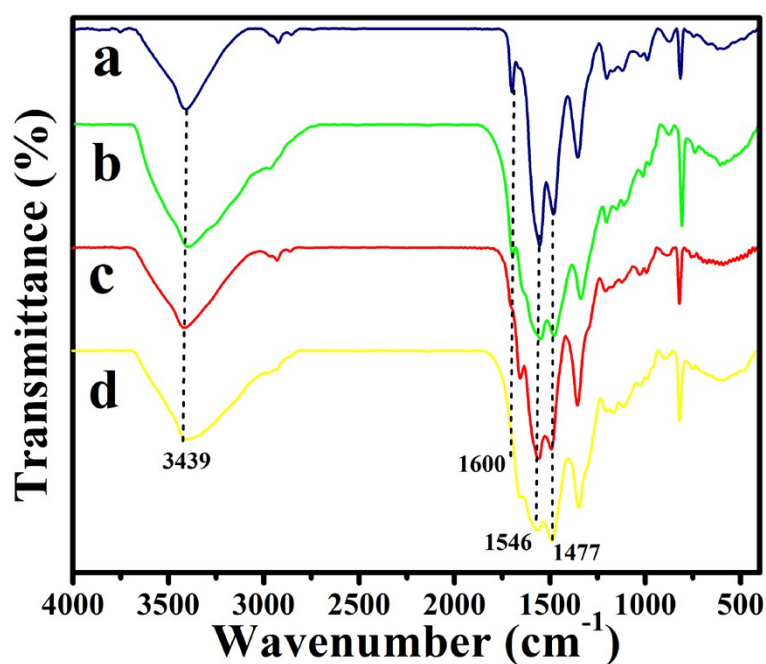

**Fig. S4** (A) FT-IR spectrums of regenerated RAPOP and g-C<sub>3</sub>N<sub>4</sub>/RAPOP with MA/TA (4/4) (a), MA/TA/g-C<sub>3</sub>N<sub>4</sub> (4/4/1) (b), MA/TA/g-C<sub>3</sub>N<sub>4</sub> (4/4/2) (c) and MA/TA/g-C<sub>3</sub>N<sub>4</sub> (4/4/4) (d) after five adsorption-desorption cycles.

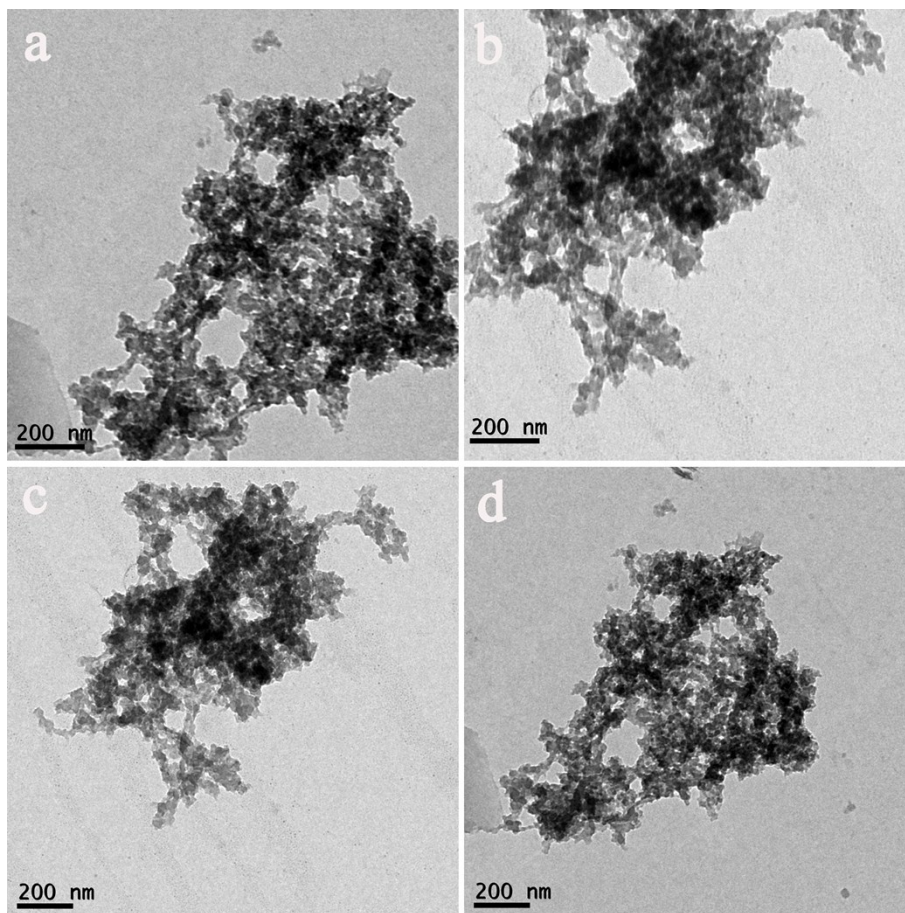

**Fig. S5 (A)** TEM images of regenerated RAPOP and g-C<sub>3</sub>N<sub>4</sub>/RAPOP with MA/TA (4/4) (a), MA/TA/g-C<sub>3</sub>N<sub>4</sub> (4/4/1) (b), MA/TA/g-C<sub>3</sub>N<sub>4</sub> (4/4/2) (c) and MA/TA/g-C<sub>3</sub>N<sub>4</sub> (4/4/4) (d) after five adsorption-desorption cycles.
